# Supplementary material for: Success for All? A Call to Re-examine How Student Success Is Defined in Higher Education
Source: Atypon-hosted journal article supplement (doi:10.1187/cbe.20-09-0223), 2021-02-26
Supplement: combinedsupmats.pdf [file combinedsupmats.pdf]

# Supplemental Material

*CBE—Life Sciences Education*

Weatherton and Schussler

## **Weatherton and Schussler Supplemental Materials**

*The 52 research articles that were used in our examination of conceptions of success in CBE LSE over the past 5 years (2015-2020). Articles with explicit definitions of success are indicated with an asterisk.*

- \* Adams, A. E. M., Randall, S., & Traustadóttir, T. (2015). A Tale of Two Sections: An Experiment to Compare the Effectiveness of a Hybrid versus a Traditional Lecture Format in Introductory Microbiology. *CBE—Life Sciences Education*, 14(1), ar6. doi:10.1187/cbe.14-08-0118
- Ainscough, L., Foulis, E., Colthorpe, K., Zimbardi, K., Robertson-Dean, M., Chunduri, P., & Lluca, L. (2016). Changes in Biology Self-Efficacy during a First-Year University Course. *CBE—Life Sciences Education*, 15(2), ar19. doi:10.1187/cbe.15-04-0092
- \* Arnim, A. G. v., & Missra, A. (2017). Graduate Training at the Interface of Computational and Experimental Biology: An Outcome Report from a Partnership of Volunteers between a University and a National Laboratory. *CBE—Life Sciences Education*, 16(4), ar61. doi:10.1187/cbe.17-02-0038
- B. Wiltbank, L., R. Williams, K., Lauren Marciniak, & L. Momsen, J. (2019). Contrasting Cases: Students' Experiences in an Active-Learning Biology Classroom. *CBE—Life Sciences Education*, 18(3), ar33. doi:10.1187/cbe.19-01-0006
- Bailey, E. G., Jensen, J., Nelson, J., Wiberg, H. K., & Bell, J. D. (2017). Weekly Formative Exams and Creative Grading Enhance Student Learning in an Introductory Biology Course. *CBE—Life Sciences Education*, 16(1), ar2. doi:10.1187/cbe.16-02-0104
- Batz, Z., Olsen, B. J., Dumont, J., Dastoor, F., & Smith, M. K. (2015). Helping Struggling Students in Introductory Biology: A Peer-Tutoring Approach That Improves Performance, Perception, and Retention. *CBE—Life Sciences Education*, 14(2), ar16. doi:10.1187/cbe.14-08-0120
- Cameron, C., Lee, H. Y., Anderson, C., Byars-Winston, A., Baldwin, C. D., & Chang, S. (2015). The Role of Scientific Communication Skills in Trainees' Intention to Pursue Biomedical Research Careers: A Social Cognitive Analysis. *CBE—Life Sciences Education*, 14(4), ar46. doi:10.1187/cbe.14-09-0152
- Carmichael, M. C., Clair, C. S., Edwards, A. M., Barrett, P., McFerrin, H., Davenport, I., . . . Ireland, S. K. (2016). Increasing URM Undergraduate Student Success through Assessment-Driven Interventions: A Multiyear Study Using Freshman-Level General Biology as a Model System. *CBE—Life Sciences Education*, 15(3), ar38. doi:10.1187/cbe.16-01-0078
- Carter-Veale, W. Y., Tull, R. G., Rutledge, J. C., & Joseph, L. N. (2016). The Dissertation House Model: Doctoral Student Experiences Coping and Writing in a Shared Knowledge Community. *CBE—Life Sciences Education*, 15(3), ar34. doi:10.1187/cbe.16-01-0081
- Chang, Y., & Brickman, P. (2018). When Group Work Doesn't Work: Insights from Students. *CBE—Life Sciences Education*, 17(3), ar52. doi:10.1187/cbe.17-09-0199
- \* Donovan, D. A., Connell, G. L., & Grunspan, D. Z. (2018). Student Learning Outcomes and Attitudes Using Three Methods of Group Formation in a Nonmajors Biology Class. *CBE—Life Sciences Education*, 17(4), ar60. doi:10.1187/cbe.17-12-0283

- Eaton, C. D., & Highlander, H. C. (2017). The Case for Biocalculus: Design, Retention, and Student Performance. *CBE—Life Sciences Education*, *16*(2), ar25. doi:10.1187/cbe.15-04-0096
- \* Eisen, A., & Eaton, D. C. (2017). A Model for Postdoctoral Education That Promotes Minority and Majority Success in the Biomedical Sciences. *CBE—Life Sciences Education*, *16*(4), ar65. doi:10.1187/cbe.17-03-0051
- England, B. J., Brigati, J. R., Schussler, E. E., & Chen, M. M. (2019). Student Anxiety and Perception of Difficulty Impact Performance and Persistence in Introductory Biology Courses. *CBE—Life Sciences Education*, *18*(2), ar21. doi:10.1187/cbe.17-12-0284
- \* Estrada, M., Young, G. R., Nagy, J., Goldstein, E. J., Ben-Zeev, A., Márquez-Magaña, L., & Eroy-Reveles, A. (2019). The Influence of Microaffirmations on Undergraduate Persistence in Science Career Pathways. *CBE—Life Sciences Education*, *18*(3), ar40. doi:10.1187/cbe.19-01-0012
- Feldon, D. F., Peugh, J., Maher, M. A., Roksa, J., & Tofel-Grehl, C. (2017). Time-to-Credit Gender Inequities of First-Year PhD Students in the Biological Sciences. *CBE—Life Sciences Education*, *16*(1), ar4. doi:10.1187/cbe.16-08-0237
- Flanagan, K. M., & Einarson, J. (2017). Gender, Math Confidence, and Grit: Relationships with Quantitative Skills and Performance in an Undergraduate Biology Course. *CBE—Life Sciences Education*, *16*(3), ar47. doi:10.1187/cbe.16-08-0253
- \* Frantz, K. J., Demetrikopoulos, M. K., Britner, S. L., Carruth, L. L., Williams, B. A., Pecore, J. L., . . . Goode, C. T. (2017). A Comparison of Internal Dispositions and Career Trajectories after Collaborative versus Apprenticed Research Experiences for Undergraduates. *CBE—Life Sciences Education*, *16*(1), ar1. doi:10.1187/cbe.16-06-0206
- Gardner, S. A., Salto, L. M., Riggs, M. L., Casiano, C. A., & Leon, M. D. (2018). Supporting the Writing Productivity of Biomedical Graduate Students: An Integrated, Structured Writing Intervention. *CBE—Life Sciences Education*, *17*(3), ar45. doi:10.1187/cbe.16-12-0350
- Gavassa, S., Benabentos, R., Kravec, M., Collins, T., & Eddy, S. (2019). Closing the Achievement Gap in a Large Introductory Course by Balancing Reduced In-Person Contact with Increased Course Structure. *CBE—Life Sciences Education*, *18*(1), ar8. doi:10.1187/cbe.18-08-0153
- Gin, L. E., Rowland, A. A., Steinwand, B., Bruno, J., & Corwin, L. A. (2018). Students Who Fail to Achieve Predefined Research Goals May Still Experience Many Positive Outcomes as a Result of CURE Participation. *CBE—Life Sciences Education*, *17*(4), ar57. doi:10.1187/cbe.18-03-0036
- \* Gregg-Jolly, L., Swartz, J., Iverson, E., Stern, J., Brown, N., & Lopatto, D. (2016). Situating Second-Year Success: Understanding Second-Year STEM Experiences at a Liberal Arts College. *CBE—Life Sciences Education*, *15*(3), ar43. doi:10.1187/cbe.16-01-0044
- Gross, D., Pietri, E. S., Anderson, G., Moyano-Camihort, K., & Graham, M. J. (2015). Increased Preclass Preparation Underlies Student Outcome Improvement in the Flipped Classroom. *CBE—Life Sciences Education*, *14*(4), ar36. doi:10.1187/cbe.15-02-0040
- Gross, D., Pietri, E. S., Anderson, G., Moyano-Camihort, K., & Graham, M. J. (2015). Increased Preclass Preparation Underlies Student Outcome Improvement in the Flipped Classroom. *CBE—Life Sciences Education*, *14*(4), ar36. doi:10.1187/cbe.15-02-0040
- \* Haeger, H., & Fresquez, C. (2016). Mentoring for Inclusion: The Impact of Mentoring on Undergraduate Researchers in the Sciences. *CBE—Life Sciences Education*, *15*(3), ar36. doi:10.1187/cbe.16-01-0016

- Hall, J. D., Harrell, J. R., Cohen, K. W., Miller, V. L., Phelps, P. V., & Cook, J. G. (2016). Preparing Postbaccalaureates for Entry and Success in Biomedical PhD Programs. *CBE—Life Sciences Education*, 15(3), ar27. doi:10.1187/cbe.16-01-0054
- Hernandez, P. R., Hopkins, P. D., Masters, K., Holland, L., Mei, B. M., Richards-Babb, M., . . . Shook, N. J. (2018). Student Integration into STEM Careers and Culture: A Longitudinal Examination of Summer Faculty Mentors and Project Ownership. *CBE—Life Sciences Education*, 17(3), ar50. doi:10.1187/cbe.18-02-0022
- Jordt, H., Eddy, S. L., Brazil, R., Lau, I., Mann, C., Brownell, S. E., . . . Freeman, S. (2017). Values Affirmation Intervention Reduces Achievement Gap between Underrepresented Minority and White Students in Introductory Biology Classes. *CBE—Life Sciences Education*, 16(3), ar41. doi:10.1187/cbe.16-12-0351
- \* Katz, L. A., Aloisio, K. M., Horton, N. J., Ly, M., Pruss, S., Queeney, K., . . . DiBartolo, P. M. (2017). A Program Aimed toward Inclusive Excellence for Underrepresented Undergraduate Women in the Sciences. *CBE—Life Sciences Education*, 16(1), ar11. doi:10.1187/cbe.16-01-0029
- Kritzinger, A., Lemmens, J.-C., & Potgieter, M. (2018). Learning Strategies for First-Year Biology: Toward Moving the “Murky Middle”. *CBE—Life Sciences Education*, 17(3), ar42. doi:10.1187/cbe.17-10-0211
- \* Kuchynka, S., Nostrand, D. F.-V., & Pollenz, R. S. (2019). Evaluating Psychosocial Mechanisms Underlying STEM Persistence in Undergraduates: Scalability and Longitudinal Analysis of Three Cohorts from a Six-Day Pre-College Engagement STEM Academy Program. *CBE—Life Sciences Education*, 18(3), ar41. doi:10.1187/cbe.19-01-0028
- Kudish, P., Shores, R., McClung, A., Smulyan, L., Vallen, E. A., & Siwicki, K. K. (2016). Active Learning Outside the Classroom: Implementation and Outcomes of Peer-Led Team-Learning Workshops in Introductory Biology. *CBE—Life Sciences Education*, 15(3), ar31. doi:10.1187/cbe.16-01-0051
- \* Lane, T. B. (2016). Beyond Academic and Social Integration: Understanding the Impact of a STEM Enrichment Program on the Retention and Degree Attainment of Underrepresented Students. *CBE—Life Sciences Education*, 15(3), ar39. doi:10.1187/cbe.16-01-0070
- Lieu, R., Wong, A., Asefirad, A., & Shaffer, J. F. (2017). Improving Exam Performance in Introductory Biology through the Use of Preclass Reading Guides. *CBE—Life Sciences Education*, 16(3), ar46. doi:10.1187/cbe.16-11-0320
- \* Martinez, L. R., Boucaud, D. W., Casadevall, A., & August, A. (2018). Factors Contributing to the Success of NIH-Designated Underrepresented Minorities in Academic and Nonacademic Research Positions. *CBE—Life Sciences Education*, 17(2), ar32. doi:10.1187/cbe.16-09-0287
- \* Maton, K. I., Beason, T. S., Godsay, S., Domingo, M. R. S., Bailey, T. C., Sun, S., & Freeman A. Hrabowski, I. (2016). Outcomes and Processes in the Meyerhoff Scholars Program: STEM PhD Completion, Sense of Community, Perceived Program Benefit, Science Identity, and Research Self-Efficacy. *CBE—Life Sciences Education*, 15(3), ar48. doi:10.1187/cbe.16-01-0062

- \* Nerio, R., Webber, A., MacLachlan, E., Lopatto, D., & Caplan, A. J. (2019). One-Year Research Experience for Associate's Degree Students Impacts Graduation, STEM Retention, and Transfer Patterns. *CBE—Life Sciences Education*, 18(2), ar25. doi:10.1187/cbe.19-02-0042
- Pacheco, W. I., Noel Jr, R. J., Porter, J. T., & Appleyard, C. B. (2015). Beyond the GRE: Using a composite score to predict the success of Puerto Rican students in a biomedical PhD program. *CBE—Life Sciences Education*, 14(2), ar13.
- Perera, V., Mead, C., Buxner, S., Lopatto, D., Horodyskyj, L., Semken, S., & Anbar, A. D. (2017). Students in Fully Online Programs Report More Positive Attitudes toward Science Than Students in Traditional, In-Person Programs. *CBE—Life Sciences Education*, 16(4), ar60. doi:10.1187/cbe.16-11-0316
- Premo, J., Cavagnetto, A., & Davis, W. B. (2018). Promoting Collaborative Classrooms: The Impacts of Interdependent Cooperative Learning on Undergraduate Interactions and Achievement. *CBE—Life Sciences Education*, 17(2), ar32. doi:10.1187/cbe.17-08-0176
- \* Richardson, K., Clark, Z., Gaines, M., Kingi, H., Miller, S., Jr., W. P., & Richardson, L. (2018). Āwhina Revolution: A Bayesian Analysis of Undergraduate and Postgraduate Completion Rates from a Program for Māori and Pacific Success in STEM Disciplines. *CBE—Life Sciences Education*, 17(1), ar15. doi:10.1187/cbe.17-07-0117
- Rodenbusch, S. E., Hernandez, P. R., Simmons, S. L., & Dolan, E. L. (2016). Early Engagement in Course-Based Research Increases Graduation Rates and Completion of Science, Engineering, and Mathematics Degrees. *CBE—Life Sciences Education*, 15(2), ar20. doi:10.1187/cbe.16-03-0117
- \* Rodrigo-Peirís, T., Xiang, L., & Cassone, V. M. (2018). A Low-Intensity, Hybrid Design between a “Traditional” and a “Course-Based” Research Experience Yields Positive Outcomes for Science Undergraduate Freshmen and Shows Potential for Large-Scale Application. *CBE—Life Sciences Education*, 17(4), ar53. doi:10.1187/cbe.17-11-0248
- Schinske, J., Cardenas, M., & Kaliangara, J. (2015). Uncovering Scientist Stereotypes and Their Relationships with Student Race and Student Success in a Diverse, Community College Setting. *CBE—Life Sciences Education*, 14(3), ar35. doi:10.1187/cbe.14-12-0231
- Sellami, N., Shaked, S., Laski, F. A., Eagan, K. M., & Sanders, E. R. (2017). Implementation of a Learning Assistant Program Improves Student Performance on Higher-Order Assessments. *CBE—Life Sciences Education*, 16(4), ar62. doi:10.1187/cbe.16-12-0341
- \* Thompson, J. J., & Jensen-Ryan, D. (2018). Becoming a “Science Person”: Faculty Recognition and the Development of Cultural Capital in the Context of Undergraduate Biology Research. *CBE—Life Sciences Education*, 17(4), ar62. doi:10.1187/cbe.17-11-0229
- \* Thompson, R. C., Monroe-White, T., Xavier, J., Howell, C., Moore, M. R., & Haynes, J. K. (2016). Preparation of Underrepresented Males for Scientific Careers: A Study of the Dr. John H. Hopps Jr. Defense Research Scholars Program at Morehouse College. *CBE—Life Sciences Education*, 15(3), ar40. doi:10.1187/cbe.15-12-0263
- \* Toven-Lindsey, B., Levis-Fitzgerald, M., Barber, P. H., & Hasson, T. (2015). Increasing Persistence in Undergraduate Science Majors: A Model for Institutional Support of Underrepresented Students. *CBE—Life Sciences Education*, 14(2), ar12. doi:10.1187/cbe.14-05-0082

- \* Walck-Shannon, E. M., Cahill, M. J., McDaniel, M. A., & Frey, R. F. (2019). Participation in Voluntary Re-quizzing Is Predictive of Increased Performance on Cumulative Assessments in Introductory Biology. *CBE—Life Sciences Education*, *18*(2), ar15. doi:10.1187/cbe.18-08-0163
- Williams, S. N., Thakore, B. K., & McGee, R. (2017). Providing Social Support for Underrepresented Racial and Ethnic Minority PhD Students in the Biomedical Sciences: A Career Coaching Model. *CBE—Life Sciences Education*, *16*(4), ar64. doi:10.1187/cbe.17-01-0021
- Wilson, M. A., DePass, A. L., & Bean, A. J. (2018). Institutional Interventions That Remove Barriers to Recruit and Retain Diverse Biomedical PhD Students. *CBE—Life Sciences Education*, *17*(2), ar27. doi:10.1187/cbe.17-09-0210
- Wilton, M., Gonzalez-Niño, E., McPartlan, P., Turner, Z., Christoffersen, R. E., & Rothman, J. H. (2019). Improving Academic Performance, Belonging, and Retention through Increasing Structure of an Introductory Biology Course. *CBE—Life Sciences Education*, *18*(4), ar53. doi:10.1187/cbe.18-08-0155
